# Supplementary material
Source: publisher site journal article supplement (https://www.dovepress.com/article/450895)
Supplement: Supplementary file 1 [file get_supplementary_file.php]

# Supplementary figures

## Figure S1

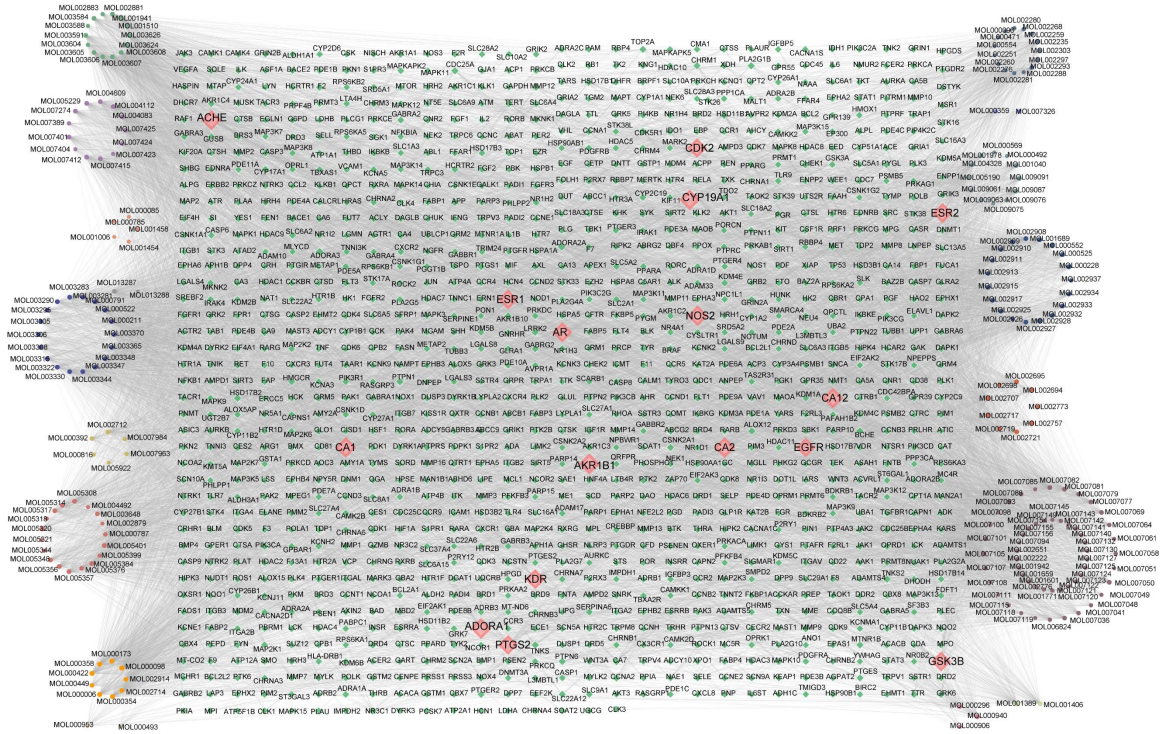

**Figure S1. Compound-target network.** Circles represent candidate compounds. Diamonds represent candidate targets, pink diamonds represent the top 15 target proteins according to degree, and diamonds with a red border represent the top 15 target proteins according to betweenness centrality. The size of the node is proportional to the value of degree.

Figure S2.

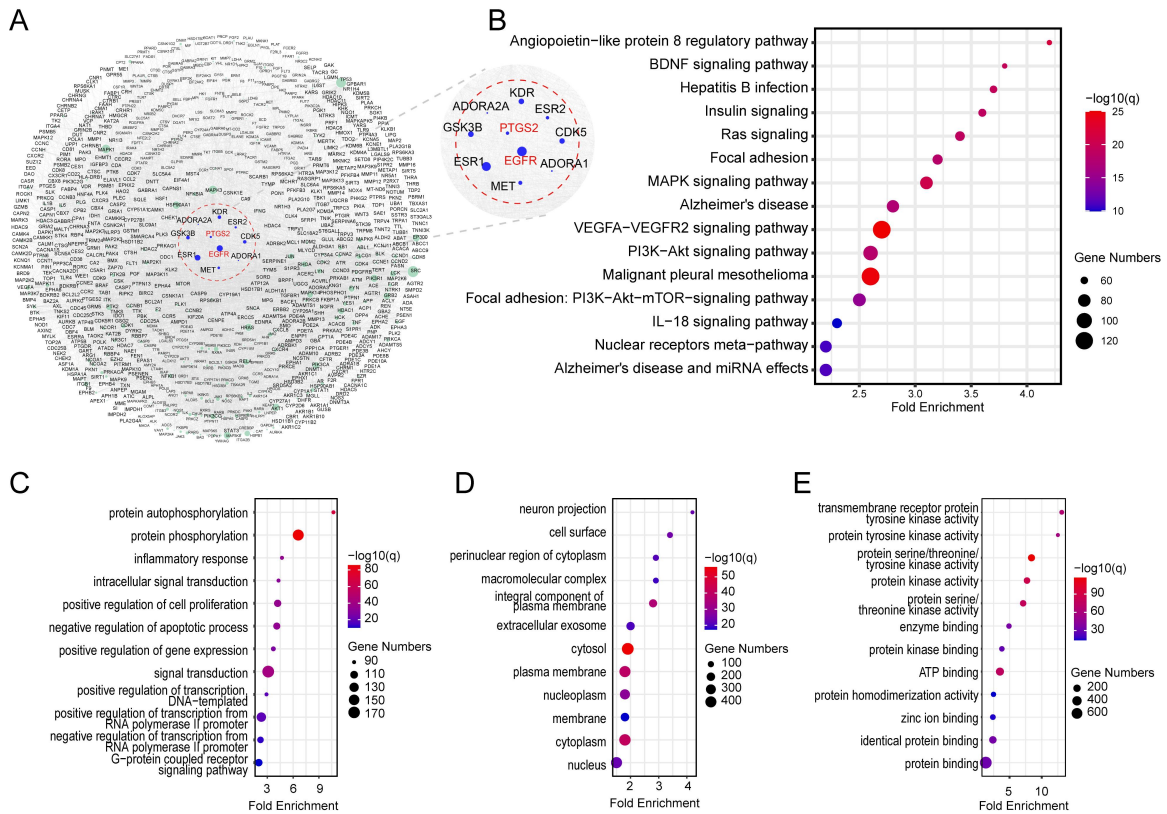

**Figure S2. Functional analysis of the compound targets.** (A) PPI network of candidate targets. Blue circles represent the hub gene, calculated by Cytohubba. (B) Wiki pathway of top 15 enriched pathways. (C) Top 12 biological processes of G.O. enrichment analysis. (D) Top 12 molecular functions of G.O. enrichment analysis. (E) Top 12 cellular components of G.O. enrichment analysis. Fold enrichment and P-value reflect the degree of importance.

**Figure S3.**

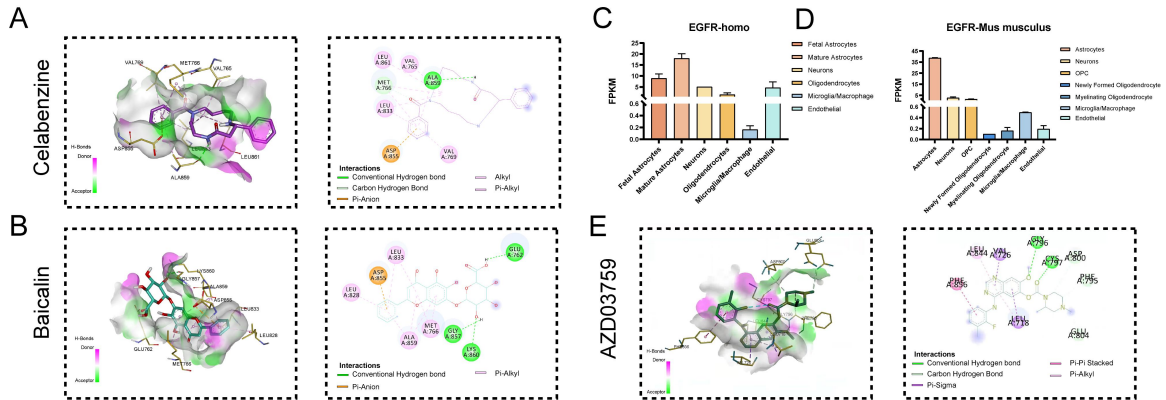

**Figure S3. Molecular docking of celabenzine and baicalin with EGFR.**

(A) The 3D and 2D interaction diagrams of celabenzine toward EGFR. (B) The 3D and 2D interaction diagrams of baicalin toward EGFR. (C) Brain RNA sequencing results of Homo sapiens. (D) Brain RNA sequencing results of mice; (E) The 3D and 2D interaction diagrams of AZD3759 toward EGFR.

Figure S4.

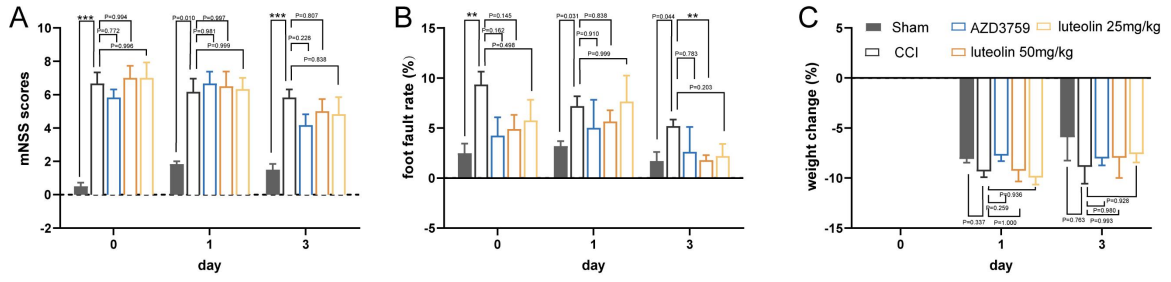

**Figure S4. Behavioral tests on days 0, 1, and 3 after CCI. (A)**

Neurobehavioral scores, **(B)** foot fault rate, and **(C)** body weight changes.

Data are expressed as the Mean  $\pm$  SEM, N = 6, \*\*  $P < 0.01$ , \*\*\*  $P < 0.001$ .

## Supplementary tables

**Table S1.** The information about the candidate compound.

| Medicinal Plant | Mol ID        | Molecule Name                   | OB (%)              | DL    |      |
|-----------------|---------------|---------------------------------|---------------------|-------|------|
| A. Annuua       | MOL000006     | luteolin                        | 36.16               | 0.25  |      |
|                 | MOL000098     | quercetin                       | 46.43               | 0.28  |      |
|                 | MOL000354     | isorhamnetin                    | 49.60               | 0.31  |      |
|                 | MOL000359     | sitosterol                      | 36.91               | 0.75  |      |
|                 | MOL000422     | kaempferol                      | 41.88               | 0.24  |      |
|                 | MOL000449     | Stigmasterol                    | 43.83               | 0.76  |      |
|                 | MOL002235     | EUPATIN                         | 50.80               | 0.41  |      |
|                 | MOL004083     | Tamarixetin                     | 32.86               | 0.31  |      |
|                 | MOL004112     | Patuletin                       | 53.11               | 0.34  |      |
|                 | MOL004609     | Areapillin                      | 48.96               | 0.41  |      |
|                 | MOL005229     | Artemetin                       | 49.55               | 0.48  |      |
|                 | MOL007274     | Skrofulein                      | 30.35               | 0.30  |      |
|                 | MOL007389     | artemisitenone                  | 54.36               | 0.31  |      |
|                 | MOL007400     | vicenin-2 Qt                    | 45.84               | 0.21  |      |
|                 | MOL007401     | Cirsiliol                       | 43.46               | 0.34  |      |
|                 | MOL007404     | vitexin Qt                      | 52.18               | 0.21  |      |
|                 | MOL007412     | DMQT                            | 42.60               | 0.37  |      |
|                 | MOL007415     | Asperglauclide                  | 58.02               | 0.52  |      |
|                 | MOL007423     | 6,8-di-c-glucosylapigenin Qt    | 59.85               | 0.21  |      |
|                 | MOL007424     | artemisinin                     | 49.88               | 0.31  |      |
|                 | MOL007425     | dihydroartemisinin              | 50.75               | 0.30  |      |
|                 | MOL007426     | deoxyartemisinin                | 54.47               | 0.26  |      |
|                 | A. Bidentatae | MOL000085                       | beta-daucosterol Qt | 36.91 | 0.75 |
|                 |               | MOL000098                       | quercetin           | 46.43 | 0.28 |
|                 |               | MOL000173                       | wogonin             | 30.68 | 0.23 |
|                 |               | MOL000358                       | beta-sitosterol     | 36.91 | 0.75 |
| MOL000422       |               | kaempferol                      | 41.88               | 0.24  |      |
| MOL000449       |               | Stigmasterol                    | 43.83               | 0.76  |      |
| MOL000785       |               | palmitate                       | 64.60               | 0.65  |      |
| MOL001006       |               | poriferasta-7,22E-dien-3beta-ol | 42.98               | 0.76  |      |
| MOL001454       |               | berberine                       | 36.86               | 0.78  |      |
| MOL001458       |               | coptisine                       | 30.67               | 0.86  |      |
| MOL002643       |               | delta 7-stigmastanol            | 37.42               | 0.75  |      |
| MOL002714       |               | baicalein                       | 33.52               | 0.21  |      |
| MOL002776       |               | Baicalin                        | 40.12               | 0.75  |      |

|               |           |                                                    |       |      |
|---------------|-----------|----------------------------------------------------|-------|------|
|               | MOL002897 | epiberberine                                       | 43.09 | 0.78 |
|               | MOL003847 | Inophyllum E                                       | 38.81 | 0.85 |
|               | MOL004355 | Spinasterol                                        | 42.98 | 0.76 |
|               | MOL012461 | 28-norolean-17-en-3-ol                             | 35.93 | 0.78 |
|               | MOL012505 | bidentatoside,ii_qt                                | 31.76 | 0.59 |
|               | MOL012537 | Spinoside A                                        | 41.75 | 0.40 |
|               | MOL012542 | $\beta$ -ecdysterone                               | 44.23 | 0.82 |
| C. Asiatica   | MOL000098 | quercetin                                          | 46.43 | 0.28 |
|               | MOL000359 | sitosterol                                         | 36.91 | 0.75 |
|               | MOL007326 | Cynarin(e)                                         | 31.76 | 0.68 |
| C. Longa      | MOL000449 | Stigmasterol                                       | 43.83 | 0.76 |
|               | MOL000493 | campesterol                                        | 37.58 | 0.71 |
|               | MOL000953 | CLR                                                | 37.87 | 0.68 |
| C. Monnieri   | MOL000358 | beta-sitosterol                                    | 36.91 | 0.75 |
|               | MOL000449 | Stigmasterol                                       | 43.83 | 0.76 |
|               | MOL001510 | 24-epicampesterol                                  | 37.58 | 0.71 |
|               | MOL001771 | poriferast-5-en-3beta-ol                           | 36.91 | 0.75 |
|               | MOL001941 | Ammidin                                            | 34.55 | 0.22 |
|               | MOL002881 | Diosmetin                                          | 31.14 | 0.27 |
|               | MOL002883 | Ethyl oleate (NF)                                  | 32.40 | 0.19 |
|               | MOL003584 | Xanthoxylin N                                      | 35.51 | 0.21 |
|               | MOL003588 | Prangenidin                                        | 36.31 | 0.22 |
|               | MOL003591 | ar-curcumene                                       | 52.34 | 0.65 |
|               | MOL003600 | cnidimol B                                         | 68.66 | 0.26 |
|               | MOL003604 | cnidimol F                                         | 54.43 | 0.28 |
|               | MOL003605 | (E)-2,3-bis(2-keto-7-methoxy-chromen-8-yl)acrolein | 56.38 | 0.71 |
|               | MOL003606 | cniforin A                                         | 55.89 | 0.47 |
|               | MOL003607 | cniforin B                                         | 36.70 | 0.60 |
|               | MOL003608 | O-Acetylcolumbianetin                              | 60.04 | 0.26 |
|               | MOL003617 | isogosferol                                        | 30.07 | 0.25 |
|               | MOL003624 | o-Isovalerylcolum bianetin                         | 64.03 | 0.36 |
|               | MOL003626 | Ostruthin                                          | 30.65 | 0.23 |
| C. Sativus    | MOL000098 | quercetin                                          | 46.43 | 0.28 |
|               | MOL000354 | isorhamnetin                                       | 49.60 | 0.31 |
|               | MOL000422 | kaempferol                                         | 41.88 | 0.24 |
|               | MOL001389 | n-heptanal                                         | 79.74 | 0.59 |
|               | MOL001406 | crocetin                                           | 35.30 | 0.26 |
| C. Tinctorius | MOL000006 | luteolin                                           | 36.16 | 0.25 |
|               | MOL000098 | quercetin                                          | 46.43 | 0.28 |
|               | MOL000358 | beta-sitosterol                                    | 36.91 | 0.75 |

|             |           |                                                                                                                  |       |      |
|-------------|-----------|------------------------------------------------------------------------------------------------------------------|-------|------|
|             | MOL000422 | kaempferol                                                                                                       | 41.88 | 0.24 |
|             | MOL000449 | Stigmasterol                                                                                                     | 43.83 | 0.76 |
|             | MOL000953 | CLR                                                                                                              | 37.87 | 0.68 |
|             | MOL001771 | poriferast-5-en-3beta-ol                                                                                         | 36.91 | 0.75 |
|             | MOL002680 | Flavoxanthin                                                                                                     | 60.41 | 0.56 |
|             | MOL002694 | 4-[(E)-4-(3,5-dimethoxy-4-oxo-1-cyclohexa-2,5-dienylidene)but-2-enylidene]-2,6-dimethoxycyclohexa-2,5-dien-1-one | 48.47 | 0.36 |
|             | MOL002695 | lignan                                                                                                           | 43.32 | 0.65 |
|             | MOL002698 | lupeol-palmitate                                                                                                 | 33.98 | 0.32 |
|             | MOL002706 | Phytoene                                                                                                         | 39.56 | 0.50 |
|             | MOL002707 | phytofluene                                                                                                      | 43.18 | 0.50 |
|             | MOL002710 | Pyrethrin II                                                                                                     | 48.36 | 0.35 |
|             | MOL002712 | 6-Hydroxykaempferol                                                                                              | 62.13 | 0.27 |
|             | MOL002714 | baicalein                                                                                                        | 33.52 | 0.21 |
|             | MOL002717 | qt_carthamone                                                                                                    | 51.03 | 0.20 |
|             | MOL002719 | 6-Hydroxynaringenin                                                                                              | 33.23 | 0.24 |
|             | MOL002721 | quercetagetin                                                                                                    | 45.01 | 0.31 |
|             | MOL002757 | 7,8-dimethyl-1H-pyrimido[5,6-g]quinoxaline-2,4-dione                                                             | 45.75 | 0.19 |
|             | MOL002773 | beta-carotene                                                                                                    | 37.18 | 0.58 |
|             | MOL002776 | Baicalin                                                                                                         | 40.12 | 0.75 |
| C. Zedoaria | MOL000296 | hederagenin                                                                                                      | 36.91 | 0.75 |
|             | MOL000906 | wenjine                                                                                                          | 47.93 | 0.27 |
|             | MOL000940 | bisdemethoxycurcumin                                                                                             | 77.38 | 0.26 |
| D. Fortune  | MOL000006 | luteolin                                                                                                         | 36.16 | 0.25 |
|             | MOL000358 | beta-sitosterol                                                                                                  | 36.91 | 0.75 |
|             | MOL000422 | kaempferol                                                                                                       | 41.88 | 0.24 |
|             | MOL000449 | Stigmasterol                                                                                                     | 43.83 | 0.76 |
|             | MOL000492 | (+)-catechin                                                                                                     | 54.83 | 0.24 |
|             | MOL000569 | digallate                                                                                                        | 61.85 | 0.26 |
|             | MOL001040 | (2R)-5,7-dihydroxy-2-(4-hydroxyphenyl)chroman-4-one                                                              | 42.36 | 0.21 |
|             | MOL001978 | Aureusidin                                                                                                       | 53.42 | 0.24 |
|             | MOL002914 | Eriodyctiol (flavanone)                                                                                          | 41.35 | 0.24 |
|             | MOL004328 | naringenin                                                                                                       | 59.29 | 0.21 |
|             | MOL005190 | eriodictyol                                                                                                      | 71.79 | 0.24 |
|             | MOL009061 | 22-Stigmasten-3-one                                                                                              | 39.25 | 0.76 |
|             | MOL009063 | Cyclolaudenol acetate                                                                                            | 41.66 | 0.79 |
|             | MOL009075 | cycloartenone                                                                                                    | 40.57 | 0.79 |

|                |           |                                                                                 |        |      |
|----------------|-----------|---------------------------------------------------------------------------------|--------|------|
|                | MOL009076 | cyclolaudenol                                                                   | 39.05  | 0.79 |
|                | MOL009078 | davallioside A Qt                                                               | 62.65  | 0.51 |
|                | MOL009087 | marioside Qt                                                                    | 70.79  | 0.19 |
|                | MOL009091 | xanthogalenol                                                                   | 41.08  | 0.32 |
| E. Breviscapus | MOL000006 | luteolin                                                                        | 36.16  | 0.25 |
|                | MOL000098 | quercetin                                                                       | 46.43  | 0.28 |
|                | MOL000392 | formononetin                                                                    | 69.67  | 0.21 |
|                | MOL000422 | kaempferol                                                                      | 41.88  | 0.24 |
|                | MOL000816 | ergosta-7,22-dien-3-one                                                         | 44.88  | 0.72 |
|                | MOL001040 | (2R)-5,7-dihydroxy-2-(4-hydroxyphenyl)chroman-4-one                             | 42.36  | 0.21 |
|                | MOL002712 | 6-Hydroxykaempferol                                                             | 62.13  | 0.27 |
|                | MOL002714 | baicalein                                                                       | 33.52  | 0.21 |
|                | MOL002914 | Eriodyctiol (flavanone)                                                         | 41.35  | 0.24 |
|                | MOL005922 | Acanthoside B                                                                   | 43.35  | 0.77 |
|                | MOL007963 | 1-hydroxy-2,3,5-trimethoxy-xanthone                                             | 101.06 | 0.30 |
|                | MOL007984 | $\Delta^5,22$ -stigmastadien-3-ol                                               | 43.83  | 0.76 |
| F. Suspensa    | MOL000006 | luteolin                                                                        | 36.16  | 0.25 |
|                | MOL000098 | quercetin                                                                       | 46.43  | 0.28 |
|                | MOL000173 | wogonin                                                                         | 30.68  | 0.23 |
|                | MOL000211 | Mairin                                                                          | 55.38  | 0.78 |
|                | MOL000358 | beta-sitosterol                                                                 | 36.91  | 0.75 |
|                | MOL000422 | kaempferol                                                                      | 41.88  | 0.24 |
|                | MOL000522 | arctiin                                                                         | 34.45  | 0.84 |
|                | MOL000791 | bicuculline                                                                     | 69.67  | 0.88 |
|                | MOL003281 | 20(S)-dammar-24-ene-3 $\beta$ ,20-diol-3-acetate                                | 40.23  | 0.82 |
|                | MOL003283 | (2R,3R,4S)-4-(4-hydroxy-3-methoxyphenyl)-7-methoxy-2,3-dimethylol-tetralin-6-ol | 66.51  | 0.39 |
|                | MOL003290 | (3R,4R)-3,4-bis[(3,4-dimethoxyphenyl)methyl]oxolan-2-one                        | 52.30  | 0.48 |
|                | MOL003295 | (+)-pinoresinol monomethyl ether                                                | 53.08  | 0.57 |
|                | MOL003305 | PHILLYRIN                                                                       | 36.40  | 0.86 |
|                | MOL003306 | ACon1_001697                                                                    | 85.12  | 0.57 |
|                | MOL003308 | (+)-pinoresinol monomethyl ether-4-D-beta-glucoside Qt                          | 61.20  | 0.57 |
|                | MOL003315 | 3beta-Acetyl-20,25-epoxydammarane-24alpha-ol                                    | 33.07  | 0.79 |



|               |           |                                             |        |      |
|---------------|-----------|---------------------------------------------|--------|------|
|               | MOL003322 | FORSYTHINOL                                 | 81.25  | 0.57 |
|               | MOL003330 | (-)-Phillygenin                             | 95.04  | 0.57 |
|               | MOL003344 | $\beta$ -amyrin acetate                     | 42.06  | 0.74 |
|               | MOL003347 | hyperforin                                  | 44.03  | 0.60 |
|               | MOL003348 | adhyperforin                                | 44.03  | 0.61 |
|               | MOL003365 | Lactucasterol                               | 40.99  | 0.85 |
|               | MOL003370 | Onjixanthone I                              | 79.16  | 0.30 |
| P. Cuspidatum | MOL000006 | luteolin                                    | 36.16  | 0.25 |
|               | MOL000098 | quercetin                                   | 46.43  | 0.28 |
|               | MOL000358 | beta-sitosterol                             | 36.91  | 0.75 |
|               | MOL000492 | (+)-catechin                                | 54.83  | 0.24 |
|               | MOL002259 | Physciondiglucoside                         | 41.65  | 0.63 |
|               | MOL002268 | rhein                                       | 47.07  | 0.28 |
|               | MOL002280 | Torachryson-8-O-beta-D-(6'-oxayl)-glucoside | 43.02  | 0.74 |
|               | MOL013281 | 6,8-Dihydroxy-7-methoxyxanthone             | 35.83  | 0.21 |
|               | MOL013287 | Physovenine                                 | 106.21 | 0.19 |
|               | MOL013288 | Picalinal                                   | 58.01  | 0.75 |
| P. Ginseng    | MOL000358 | beta-sitosterol                             | 36.91  | 0.75 |
|               | MOL000422 | kaempferol                                  | 41.88  | 0.24 |
|               | MOL000449 | Stigmasterol                                | 43.83  | 0.76 |
|               | MOL000787 | Fumarine                                    | 59.26  | 0.83 |
|               | MOL002879 | Diop                                        | 43.59  | 0.39 |
|               | MOL003648 | Inermin                                     | 65.83  | 0.54 |
|               | MOL004492 | Chrysanthemaxanthin                         | 38.72  | 0.58 |
|               | MOL005308 | Aposiopolamine                              | 66.65  | 0.22 |
|               | MOL005314 | Celabenzine                                 | 101.88 | 0.49 |
|               | MOL005317 | Deoxyharringtonine                          | 39.27  | 0.81 |
|               | MOL005318 | Dianthramine                                | 40.45  | 0.20 |
|               | MOL005320 | arachidonate                                | 45.57  | 0.20 |
|               | MOL005321 | Frutinone A                                 | 65.90  | 0.34 |
|               | MOL005344 | ginsenoside rh2                             | 36.32  | 0.56 |
|               | MOL005348 | Ginsenoside-Rh4_qt                          | 31.11  | 0.78 |
|               | MOL005356 | Girinimbin                                  | 61.22  | 0.31 |
|               | MOL005357 | Gomisin B                                   | 31.99  | 0.83 |
|               | MOL005360 | malkangunin                                 | 57.71  | 0.63 |
|               | MOL005376 | Panaxadiol                                  | 33.09  | 0.79 |
|               | MOL005384 | suchilactone                                | 57.52  | 0.56 |
|               | MOL005399 | alexandrin_qt                               | 36.91  | 0.75 |
|               | MOL005401 | ginsenoside Rg5_qt                          | 39.56  | 0.79 |

|                |                         |                                                |       |      |
|----------------|-------------------------|------------------------------------------------|-------|------|
| R. Tanguticum  | MOL000096               | (-)-catechin                                   | 49.68 | 0.24 |
|                | MOL000358               | beta-sitosterol                                | 36.91 | 0.75 |
|                | MOL000471               | aloe-emodin                                    | 83.38 | 0.24 |
|                | MOL000554               | gallic                                         |       |      |
|                |                         | acid-3-O-(6'-O-galloyl)-glucoside              | 30.25 | 0.67 |
|                | MOL002235               | EUPATIN                                        | 50.80 | 0.41 |
|                | MOL002251               | Mutatochrome                                   | 48.64 | 0.61 |
|                | MOL002259               | Physciondiglucoside                            | 41.65 | 0.63 |
|                | MOL002260               | Procyanidin B-5,3'-O-gallate                   | 31.99 | 0.32 |
|                | MOL002268               | rhein                                          | 47.07 | 0.28 |
|                | MOL002276               | Sennoside E_qt                                 | 50.69 | 0.61 |
|                | MOL002280               | Torachryson-8-O-beta-D-(6'-oxayl)-glucoside    | 43.02 | 0.74 |
|                |                         | Toralactone                                    | 46.46 | 0.24 |
|                | MOL002288               | Emodin-1-O-beta-D-glucopyranoside              | 44.81 | 0.80 |
|                | MOL002293               | Sennoside D_qt                                 | 61.06 | 0.61 |
|                | MOL002297               | Daucosterol_qt                                 | 35.89 | 0.70 |
|                | MOL002303               | palmidin A                                     | 32.45 | 0.65 |
| S. Baicalensis | MOL000173               | wogonin                                        | 30.68 | 0.23 |
|                | MOL000228               | (2R)-7-hydroxy-5-methoxy-2-phenylchroman-4-one | 55.23 | 0.20 |
|                |                         | beta-sitosterol                                | 36.91 | 0.75 |
|                | MOL000358               | beta-sitosterol                                | 36.91 | 0.75 |
|                | MOL000359               | sitosterol                                     | 36.91 | 0.75 |
|                | MOL000525               | Norwogonin                                     | 39.40 | 0.21 |
|                | MOL000552               | 5,2'-Dihydroxy-6,7,8-trimethoxyflavone         | 31.71 | 0.35 |
|                |                         | acacetin                                       | 34.97 | 0.24 |
|                | MOL001689               | acacetin                                       | 34.97 | 0.24 |
|                | MOL002714               | baicalein                                      | 33.52 | 0.21 |
|                | MOL002908               | 5,8,2'-Trihydroxy-7-methoxyflavone             | 37.01 | 0.27 |
|                |                         | 5,7,2,5-tetrahydroxy-8,6-dimethoxyflavone      | 33.82 | 0.45 |
|                | MOL002910               | Carthamidin                                    | 41.15 | 0.24 |
|                | MOL002911               | 2,6,2',4'-tetrahydroxy-6'-methoxychalcone      | 69.04 | 0.22 |
|                |                         | Dihydrobaicalin_qt                             | 40.04 | 0.21 |
| MOL002914      | Eriodyctiol (flavanone) | 41.35                                          | 0.24  |      |
| MOL002915      | Salvigenin              | 49.07                                          | 0.33  |      |

|                 |           |                                                                                        |        |      |
|-----------------|-----------|----------------------------------------------------------------------------------------|--------|------|
|                 | MOL002917 | 5,2',6'-Trihydroxy-7,8-dimethoxyflavone                                                | 45.05  | 0.33 |
|                 | MOL002925 | 5,7,2',6'-Tetrahydroxyflavone                                                          | 37.01  | 0.24 |
|                 | MOL002926 | dihydrooroxylin A                                                                      | 38.72  | 0.23 |
|                 | MOL002927 | Skullcapflavone II                                                                     | 69.51  | 0.44 |
|                 | MOL002928 | oroxylin a                                                                             | 41.37  | 0.23 |
|                 | MOL002932 | Panicolin                                                                              | 76.26  | 0.29 |
|                 | MOL002933 | 5,7,4'-Trihydroxy-8-methoxyflavone                                                     | 36.56  | 0.27 |
|                 | MOL002934 | NEOBAICALEIN                                                                           | 104.34 | 0.44 |
|                 | MOL002937 | DIHYDROOROXYLIN                                                                        | 66.06  | 0.23 |
| S. Miltiorrhiza | MOL000006 | luteolin                                                                               | 36.16  | 0.25 |
|                 | MOL000569 | digallate                                                                              | 61.85  | 0.26 |
|                 | MOL001601 | 1,2,5,6-tetrahydrotanshinone                                                           | 38.75  | 0.36 |
|                 | MOL001659 | Poriferasterol                                                                         | 43.83  | 0.76 |
|                 | MOL001771 | poriferast-5-en-3beta-ol                                                               | 36.91  | 0.75 |
|                 | MOL001942 | isoimperatorin                                                                         | 45.46  | 0.23 |
|                 | MOL002222 | sugiol                                                                                 | 36.11  | 0.28 |
|                 | MOL002651 | Dehydrotanshinone II A                                                                 | 43.76  | 0.40 |
|                 | MOL002776 | Baicalin                                                                               | 40.12  | 0.75 |
|                 | MOL006824 | $\alpha$ -amyrin                                                                       | 39.51  | 0.76 |
|                 | MOL007036 | 5,6-dihydroxy-7-isopropyl-1,1-dimethyl-2,3-dihydrophenanthrene-4-one                   | 33.77  | 0.29 |
|                 | MOL007041 | 2-isopropyl-8-methylphenanthrene-3,4-dione                                             | 40.86  | 0.23 |
|                 | MOL007045 | 3 $\alpha$ -hydroxytanshinone II a                                                     | 44.93  | 0.44 |
|                 | MOL007048 | (E)-3-[2-(3,4-dihydroxyphenyl)-7-hydroxy-benzofuran-4-yl]acrylic acid                  | 48.24  | 0.31 |
|                 | MOL007049 | 4-methylenemiltirone                                                                   | 34.35  | 0.23 |
|                 | MOL007050 | 2-(4-hydroxy-3-methoxyphenyl)-5-(3-hydroxypropyl)-7-methoxy-3-benzofurancarboxaldehyde | 62.78  | 0.40 |
|                 | MOL007051 | 6-o-syringyl-8-o-acetylshanzhiside methyl ester                                        | 46.69  | 0.71 |
|                 | MOL007058 | formyltanshinone                                                                       | 73.44  | 0.42 |
|                 | MOL007059 | 3-beta-Hydroxymethylenetanshinone                                                      | 32.16  | 0.41 |
|                 | MOL007061 | Methylenetanshinone                                                                    | 37.07  | 0.36 |

|           |                                                                                        |        |      |
|-----------|----------------------------------------------------------------------------------------|--------|------|
| MOL007063 | przewalskin a                                                                          | 37.11  | 0.65 |
| MOL007064 | przewalskin b                                                                          | 110.32 | 0.44 |
| MOL007068 | Przewaquinone B                                                                        | 62.24  | 0.41 |
| MOL007069 | przewaquinone c                                                                        | 55.74  | 0.40 |
| MOL007070 | (6S,7R)-6,7-dihydroxy-1,6-dimethyl-8,9-dihydro-7H-naphtho[8,7-g]benzofuran-10,11-dione | 41.31  | 0.45 |
| MOL007071 | przewaquinone f                                                                        | 40.31  | 0.46 |
| MOL007077 | sclareol                                                                               | 43.67  | 0.21 |
| MOL007079 | tanshinaldehyde                                                                        | 52.47  | 0.45 |
| MOL007081 | Danshenol B                                                                            | 57.95  | 0.56 |
| MOL007082 | Danshenol A                                                                            | 56.97  | 0.52 |
| MOL007085 | Salvilenone                                                                            | 30.38  | 0.38 |
| MOL007088 | cryptotanshinone                                                                       | 52.34  | 0.40 |
| MOL007093 | dan-shexinkum d                                                                        | 38.88  | 0.55 |
| MOL007094 | danshenspiroketallactone                                                               | 50.43  | 0.31 |
| MOL007098 | deoxyneocryptotanshinone                                                               | 49.40  | 0.29 |
| MOL007100 | dihydrotanshinlactone                                                                  | 38.68  | 0.32 |
| MOL007101 | dihydrotanshinone I                                                                    | 45.04  | 0.36 |
| MOL007105 | epidanshenspiroketallactone                                                            | 68.27  | 0.31 |
| MOL007107 | C09092                                                                                 | 36.07  | 0.25 |
| MOL007108 | isocryptotanshinone                                                                    | 54.98  | 0.39 |
| MOL007111 | Isotanshinone II                                                                       | 49.92  | 0.40 |
| MOL007115 | manool                                                                                 | 45.04  | 0.20 |
| MOL007118 | microstegiol                                                                           | 39.61  | 0.28 |
| MOL007119 | miltionone I                                                                           | 49.68  | 0.32 |
| MOL007120 | miltionone II                                                                          | 71.03  | 0.44 |
| MOL007121 | miltipolone                                                                            | 36.56  | 0.37 |
| MOL007122 | Miltirone                                                                              | 38.76  | 0.25 |
| MOL007123 | miltirone II                                                                           | 44.95  | 0.24 |
| MOL007124 | neocryptotanshinone ii                                                                 | 39.46  | 0.23 |
| MOL007125 | neocryptotanshinone                                                                    | 52.49  | 0.32 |
| MOL007127 | 1-methyl-8,9-dihydro-7H-naphtho[5,6-g]benzofuran-6,10,11-trione                        | 34.72  | 0.37 |
| MOL007130 | prolithospermic acid                                                                   | 64.37  | 0.31 |
| MOL007132 | (2R)-3-(3,4-dihydroxyphenyl)-2-[(Z)-3-(3,4-dihydroxyphenyl)acryloyl]oxy-propionic acid | 109.38 | 0.35 |

|           |                                                                                          |       |      |
|-----------|------------------------------------------------------------------------------------------|-------|------|
| MOL007140 | (Z)-3-[2-[(E)-2-(3,4-dihydroxyphenyl)vinyl]-3,4-dihydroxyphenyl]acrylic acid             | 88.54 | 0.26 |
| MOL007141 | salvianolic acid g                                                                       | 45.56 | 0.61 |
| MOL007142 | salvianolic acid j                                                                       | 43.38 | 0.72 |
| MOL007143 | salvilenone l                                                                            | 32.43 | 0.23 |
| MOL007145 | salviolone                                                                               | 31.72 | 0.24 |
| MOL007149 | NSC 122421                                                                               | 34.49 | 0.28 |
| MOL007150 | (6S)-6-hydroxy-1-methyl-6-methylol-8,9-dihydro-7H-naphtho[8,7-g]benzofuran-10,11-quinone | 75.39 | 0.46 |
| MOL007151 | Tanshindiol B                                                                            | 42.67 | 0.45 |
| MOL007152 | Przewaquinone E                                                                          | 42.85 | 0.45 |
| MOL007154 | tanshinone iia                                                                           | 49.89 | 0.40 |
| MOL007155 | (6S)-6-(hydroxymethyl)-1,6-dimethyl-8,9-dihydro-7H-naphtho[8,7-g]benzofuran-10,11-dione  | 65.26 | 0.45 |
| MOL007156 | tanshinone VI                                                                            | 45.64 | 0.30 |

Footnotes: OB (oral bioavailability); DL: drug likeness.

**Table S2.** The information about the enrolled medical plants.

| <b>Herb name</b> | <b>References</b>                | <b>Enrolled Compound Number</b> |
|------------------|----------------------------------|---------------------------------|
| S. Miltiorrhiza  | PMID: 15553818<br>PMID: 21134421 | 65                              |
| S. Baicalensis   | PMID: 30686973<br>PMID: 30127597 | 24                              |
| F. Suspensa      | PMID: 31923823                   | 23                              |
| P. Ginseng       | PMID: 24052247<br>PMID: 15832003 | 22                              |
| A. Annua         | PMID: 30108544                   | 22                              |
| C. Tinctorius    | PMID: 27599591                   | 22                              |
| A. Bidentatae    | PMID: 34790728                   | 20                              |
| C. Monnieri      | PMID: 22153917                   | 19                              |
| D. Fortune       | PMID: 36565356                   | 18                              |
| R. Tanguticum    | PMID: 27901023<br>PMID: 28264680 | 16                              |
| E. Breviscapus   | PMID: 28250753                   | 12                              |
| P. Cuspidatum    | PMID: 27122047<br>PMID: 18654909 | 10                              |
| C. Sativus       | PMID: 35322143                   | 5                               |
| C. Longa         | PMID: 23932920                   | 3                               |
| C. Asiatica      | PMID: 34924122                   | 3                               |
| C. Zedoaria      | PMID: 29992051                   | 3                               |

**Table S3. The top 15 central proteins in the protein-protein network of the compound targets.**

| <b>Proteins</b> | <b>BetweennessCentrality</b> | <b>Proteins</b> | <b>Degree</b> |
|-----------------|------------------------------|-----------------|---------------|
| AR              | 0.01680068                   | CYP19A1         | 165           |
| CDK2            | 0.01405804                   | AR              | 165           |
| ESR2            | 0.01348334                   | ESR2            | 160           |
| ESR1            | 0.01345255                   | ACHE            | 159           |
| GSK3B           | 0.01334269                   | ESR1            | 152           |
| CYP19A1         | 0.01269389                   | CDK2            | 142           |
| KDR             | 0.01234043                   | PTGS2           | 139           |
| EGFR            | 0.01123543                   | AKR1B1          | 136           |
| PTGS2           | 0.01119334                   | GSK3B           | 131           |
| ACHE            | 0.01068041                   | KDR             | 129           |
| MAPK14          | 0.01024397                   | NOS2            | 123           |
| MAPK8           | 0.0098862                    | CDK1            | 120           |
| PARP1           | 0.00933457                   | EGFR            | 118           |
| PIM1            | 0.00831                      | MAPK14          | 117           |
| PDE10A          | 0.00810412                   | ADORA1          | 115           |

**Table S4.** The details of topologic analysis of the overlapped targets of compound and TBI by Cytohubba.

| Node name | MCC      | DMNC | MNC | Degree | EPC   | Bottle Neck | EcCentricity | Closeness | Radiality | Betweenness | Stress | Clustering Coefficient |
|-----------|----------|------|-----|--------|-------|-------------|--------------|-----------|-----------|-------------|--------|------------------------|
| AKT1      | 2.51E+13 | 0.49 | 87  | 87     | 26.03 | 75          | 0.33         | 106.33    | 3.72      | 1657.35     | 13360  | 0.26                   |
| IL6       | 4.76E+13 | 0.57 | 75  | 76     | 25.37 | 3           | 0.33         | 100.33    | 3.61      | 1120.96     | 9090   | 0.31                   |
| VEGFA     | 4.76E+13 | 0.56 | 75  | 75     | 24.76 | 2           | 0.33         | 100.00    | 3.61      | 893.44      | 8192   | 0.31                   |
| TNF       | 4.76E+13 | 0.61 | 67  | 67     | 23.85 | 1           | 0.33         | 95.83     | 3.54      | 553.65      | 5804   | 0.35                   |
| CASP3     | 4.76E+13 | 0.59 | 64  | 64     | 22.69 | 3           | 0.33         | 94.67     | 3.53      | 702.54      | 6178   | 0.35                   |
| SRC       | 4.76E+13 | 0.62 | 62  | 63     | 23.98 | 7           | 0.33         | 94.17     | 3.52      | 920.20      | 7886   | 0.35                   |
| EGFR      | 4.75E+13 | 0.61 | 60  | 60     | 22.57 | 4           | 0.33         | 92.00     | 3.47      | 508.12      | 5298   | 0.36                   |
| APP       | 1.36E+12 | 0.55 | 58  | 58     | 21.45 | 7           | 0.50         | 92.00     | 3.50      | 797.27      | 6712   | 0.33                   |
| STAT3     | 4.76E+13 | 0.67 | 55  | 55     | 22.12 | 1           | 0.33         | 90.00     | 3.45      | 389.75      | 4278   | 0.41                   |
| PTGS2     | 4.60E+13 | 0.69 | 54  | 54     | 22.03 | 1           | 0.33         | 89.17     | 3.43      | 345.35      | 3664   | 0.43                   |
| KNG1      | 1.31E+12 | 0.58 | 51  | 51     | 19.89 | 10          | 0.33         | 87.83     | 3.41      | 659.09      | 6514   | 0.36                   |
| CXCR4     | 4.77E+13 | 0.72 | 50  | 50     | 21.79 | 1           | 0.33         | 87.17     | 3.40      | 284.03      | 3232   | 0.46                   |
| TLR4      | 4.67E+11 | 0.67 | 49  | 49     | 20.89 | 2           | 0.33         | 86.67     | 3.39      | 414.02      | 4128   | 0.42                   |
| MTOR      | 4.69E+13 | 0.73 | 45  | 45     | 19.32 | 1           | 0.33         | 84.83     | 3.37      | 255.67      | 2564   | 0.48                   |
| NOS3      | 5.27E+11 | 0.63 | 43  | 43     | 19.14 | 1           | 0.33         | 83.50     | 3.33      | 278.58      | 2874   | 0.42                   |
| CCND1     | 4.67E+13 | 0.78 | 41  | 41     | 18.29 | 1           | 0.33         | 82.33     | 3.31      | 114.91      | 1306   | 0.53                   |
| KDR       | 4.68E+13 | 0.75 | 39  | 39     | 19.01 | 3           | 0.33         | 81.50     | 3.30      | 340.07      | 3450   | 0.52                   |
| ESR1      | 4.74E+13 | 0.88 | 38  | 38     | 19.46 | 1           | 0.33         | 80.67     | 3.28      | 71.25       | 956    | 0.60                   |
| SIRT1     | 4.40E+11 | 0.77 | 37  | 37     | 17.88 | 3           | 0.33         | 80.17     | 3.27      | 114.69      | 1208   | 0.54                   |
| HIF1A     | 4.54E+13 | 0.79 | 37  | 37     | 18.81 | 1           | 0.33         | 80.17     | 3.27      | 99.30       | 1196   | 0.55                   |
| SERPINE1  | 5.29E+11 | 0.78 | 36  | 36     | 18.02 | 1           | 0.33         | 79.83     | 3.27      | 116.05      | 1486   | 0.55                   |
| STAT1     | 4.36E+13 | 0.77 | 35  | 35     | 17.08 | 1           | 0.33         | 79.17     | 3.25      | 113.67      | 1336   | 0.54                   |
| ERBB2     | 4.50E+13 | 0.78 | 34  | 34     | 17.73 | 4           | 0.33         | 78.33     | 3.23      | 268.96      | 2464   | 0.56                   |



|                     |          |      |    |    |       |   |      |       |      |        |      |      |
|---------------------|----------|------|----|----|-------|---|------|-------|------|--------|------|------|
| F2                  | 4.28E+09 | 0.67 | 34 | 34 | 17.09 | 3 | 0.33 | 79.00 | 3.26 | 198.20 | 2626 | 0.48 |
| OPRM1               | 1.31E+12 | 0.70 | 32 | 33 | 15.51 | 2 | 0.33 | 78.83 | 3.27 | 352.74 | 4566 | 0.48 |
| SELP                | 1.50E+09 | 0.72 | 30 | 30 | 16.06 | 1 | 0.33 | 76.67 | 3.21 | 86.56  | 1128 | 0.54 |
| CNR1                | 1.31E+12 | 0.70 | 29 | 29 | 14.00 | 2 | 0.33 | 76.00 | 3.20 | 167.72 | 2582 | 0.52 |
| PLG                 | 4.10E+11 | 0.86 | 29 | 29 | 16.39 | 1 | 0.33 | 76.17 | 3.21 | 107.26 | 1542 | 0.65 |
| AGTR1               | 1.56E+09 | 0.71 | 29 | 29 | 15.91 | 1 | 0.33 | 76.50 | 3.22 | 77.68  | 1226 | 0.53 |
| CXCR2               | 1.31E+12 | 0.86 | 29 | 29 | 16.06 | 1 | 0.33 | 76.17 | 3.21 | 48.12  | 964  | 0.65 |
| MAPK10              | 4.37E+10 | 0.72 | 27 | 28 | 14.93 | 2 | 0.33 | 75.67 | 3.20 | 345.74 | 2686 | 0.51 |
| GRM5                | 3.77E+06 | 0.46 | 28 | 28 | 12.05 | 5 | 0.33 | 75.17 | 3.17 | 337.88 | 2890 | 0.35 |
| HMOX1               | 2.10E+10 | 0.80 | 27 | 28 | 15.29 | 2 | 0.33 | 75.50 | 3.19 | 311.78 | 2526 | 0.57 |
| NFKB1               | 5.61E+11 | 0.94 | 28 | 28 | 15.86 | 1 | 0.33 | 75.00 | 3.17 | 23.29  | 342  | 0.71 |
| ADRBK1              | 4.86E+08 | 0.62 | 27 | 27 | 13.47 | 1 | 0.33 | 75.17 | 3.19 | 115.74 | 1266 | 0.48 |
| TXN                 | 1.37E+11 | 0.79 | 27 | 27 | 14.64 | 1 | 0.25 | 74.58 | 3.16 | 54.29  | 622  | 0.61 |
| BDKRB2              | 1.31E+12 | 0.74 | 26 | 26 | 12.58 | 1 | 0.33 | 72.33 | 3.07 | 47.51  | 564  | 0.58 |
| CCR1                | 1.31E+12 | 0.87 | 26 | 26 | 14.45 | 1 | 0.33 | 74.50 | 3.17 | 37.10  | 736  | 0.68 |
| CXCR3               | 1.31E+12 | 0.89 | 26 | 26 | 14.97 | 1 | 0.33 | 74.50 | 3.17 | 33.96  | 692  | 0.70 |
| FLT1                | 2.12E+13 | 0.92 | 26 | 26 | 15.42 | 1 | 0.33 | 74.33 | 3.17 | 21.71  | 356  | 0.72 |
| ADCY1               | 1.31E+12 | 0.67 | 22 | 25 | 11.47 | 3 | 0.33 | 73.00 | 3.12 | 389.48 | 2394 | 0.43 |
| ENSG000001<br>96689 | 7.73E+06 | 0.58 | 25 | 25 | 13.70 | 1 | 0.33 | 74.67 | 3.20 | 142.89 | 2500 | 0.46 |
| ADORA1              | 1.31E+12 | 0.87 | 25 | 25 | 13.13 | 1 | 0.33 | 74.17 | 3.17 | 33.35  | 610  | 0.69 |
| TLR9                | 3.76E+10 | 0.87 | 25 | 25 | 14.61 | 1 | 0.25 | 73.08 | 3.12 | 23.49  | 338  | 0.69 |
| P2RY12              | 1.31E+12 | 0.80 | 23 | 23 | 12.57 | 1 | 0.33 | 72.50 | 3.13 | 35.75  | 438  | 0.66 |
| PRKCZ               | 2.03E+08 | 0.69 | 22 | 22 | 13.47 | 1 | 0.33 | 72.83 | 3.16 | 51.04  | 638  | 0.58 |
| PDGFRB              | 1.31E+12 | 0.77 | 22 | 22 | 13.60 | 1 | 0.33 | 72.00 | 3.12 | 29.03  | 398  | 0.64 |
| GSK3B               | 1.29E+10 | 0.79 | 22 | 22 | 13.02 | 1 | 0.33 | 72.00 | 3.12 | 23.37  | 288  | 0.66 |
| C5AR1               | 1.31E+12 | 0.87 | 22 | 22 | 12.61 | 1 | 0.33 | 71.67 | 3.10 | 21.33  | 356  | 0.72 |

---

|        |          |      |    |    |       |   |      |       |      |        |      |      |
|--------|----------|------|----|----|-------|---|------|-------|------|--------|------|------|
| HDAC1  | 2.81E+11 | 0.87 | 22 | 22 | 14.21 | 1 | 0.25 | 70.92 | 3.06 | 20.67  | 244  | 0.72 |
| BDKRB1 | 1.31E+12 | 0.86 | 22 | 22 | 11.17 | 1 | 0.33 | 69.67 | 3.01 | 19.54  | 224  | 0.71 |
| SHH    | 2.00E+09 | 0.81 | 20 | 21 | 13.28 | 1 | 0.33 | 71.83 | 3.13 | 117.30 | 1196 | 0.63 |
| FPR1   | 1.31E+12 | 0.85 | 21 | 21 | 11.70 | 1 | 0.33 | 70.67 | 3.07 | 20.83  | 314  | 0.71 |
| ADORA3 | 1.31E+12 | 0.97 | 21 | 21 | 12.56 | 1 | 0.33 | 72.17 | 3.14 | 12.58  | 386  | 0.82 |
| CDK5   | 1.43E+05 | 0.60 | 20 | 20 | 12.23 | 1 | 0.33 | 71.33 | 3.12 | 42.30  | 504  | 0.51 |
| MMP7   | 1.58E+12 | 0.99 | 20 | 20 | 14.15 | 1 | 0.33 | 71.33 | 3.12 | 5.89   | 96   | 0.85 |
| NOS1   | 8.13E+05 | 0.58 | 19 | 19 | 11.92 | 1 | 0.33 | 70.83 | 3.11 | 50.01  | 644  | 0.51 |
| EDNRB  | 3.68E+06 | 0.64 | 19 | 19 | 10.97 | 1 | 0.33 | 70.50 | 3.10 | 41.84  | 600  | 0.56 |
| IKBKB  | 1.87E+10 | 0.85 | 19 | 19 | 12.16 | 1 | 0.33 | 70.33 | 3.09 | 15.04  | 228  | 0.74 |
| F3     | 2.51E+08 | 0.85 | 19 | 19 | 11.90 | 1 | 0.33 | 70.33 | 3.09 | 14.74  | 240  | 0.74 |
| TERT   | 2.54E+10 | 0.92 | 19 | 19 | 12.56 | 1 | 0.33 | 70.17 | 3.08 | 8.89   | 130  | 0.81 |
| MET    | 1.32E+12 | 1.03 | 18 | 18 | 13.40 | 1 | 0.33 | 70.33 | 3.10 | 2.20   | 48   | 0.92 |
| GRIN1  | 7.82E+02 | 0.40 | 17 | 17 | 7.45  | 1 | 0.33 | 69.50 | 3.08 | 170.92 | 1814 | 0.36 |
| NLRP3  | 2.10E+08 | 0.85 | 17 | 17 | 12.36 | 1 | 0.25 | 68.92 | 3.05 | 10.09  | 158  | 0.77 |
| PKM    | 7.68E+05 | 0.62 | 16 | 16 | 9.60  | 2 | 0.25 | 68.58 | 3.05 | 142.55 | 1442 | 0.58 |
| LGALS3 | 1.17E+07 | 0.78 | 16 | 16 | 11.03 | 2 | 0.33 | 67.83 | 3.02 | 58.62  | 608  | 0.73 |
| PTGER4 | 3.99E+06 | 0.63 | 16 | 16 | 11.09 | 1 | 0.33 | 69.17 | 3.08 | 35.02  | 436  | 0.58 |
| ADAM10 | 3.06E+04 | 0.56 | 16 | 16 | 10.65 | 2 | 0.33 | 69.00 | 3.07 | 29.39  | 346  | 0.52 |
| TACR1  | 3.68E+06 | 0.70 | 16 | 16 | 9.63  | 1 | 0.33 | 69.17 | 3.08 | 25.33  | 586  | 0.65 |
| MAP3K5 | 6.17E+06 | 0.76 | 16 | 16 | 11.87 | 1 | 0.33 | 69.00 | 3.07 | 24.95  | 240  | 0.71 |
| IDO1   | 5.08E+07 | 0.76 | 16 | 16 | 11.59 | 1 | 0.25 | 68.92 | 3.06 | 20.27  | 242  | 0.71 |
| ITGB3  | 8.30E+04 | 0.66 | 16 | 16 | 9.81  | 1 | 0.33 | 68.50 | 3.05 | 18.33  | 228  | 0.62 |
| ESR2   | 1.48E+09 | 0.92 | 16 | 16 | 11.38 | 1 | 0.25 | 68.58 | 3.05 | 5.40   | 76   | 0.86 |
| GRIN2A | 7.86E+02 | 0.47 | 15 | 15 | 7.23  | 1 | 0.33 | 68.83 | 3.08 | 83.12  | 1082 | 0.45 |
| IDH1   | 4.80E+03 | 0.56 | 15 | 15 | 9.01  | 1 | 0.33 | 66.67 | 2.98 | 69.01  | 626  | 0.53 |
| NGFR   | 3.11E+04 | 0.66 | 14 | 15 | 9.42  | 1 | 0.33 | 68.00 | 3.04 | 29.19  | 332  | 0.56 |

---

|         |          |      |    |    |       |   |      |       |      |        |      |      |
|---------|----------|------|----|----|-------|---|------|-------|------|--------|------|------|
| MAPT    | 9.12E+04 | 0.64 | 15 | 15 | 9.30  | 1 | 0.33 | 69.17 | 3.10 | 26.52  | 292  | 0.61 |
| TBXA2R  | 3.63E+06 | 0.59 | 15 | 15 | 7.65  | 1 | 0.33 | 66.33 | 2.96 | 23.53  | 212  | 0.56 |
| MME     | 3.53E+03 | 0.54 | 15 | 15 | 10.07 | 1 | 0.33 | 68.00 | 3.04 | 15.92  | 240  | 0.51 |
| FGFR1   | 1.60E+08 | 0.90 | 15 | 15 | 10.79 | 1 | 0.33 | 67.67 | 3.02 | 4.33   | 66   | 0.86 |
| NTRK1   | 4.76E+02 | 0.43 | 14 | 14 | 8.10  | 1 | 0.33 | 67.33 | 3.02 | 75.33  | 1042 | 0.42 |
| ADORA2A | 9.67E+04 | 0.68 | 14 | 14 | 9.88  | 1 | 0.33 | 68.67 | 3.09 | 16.56  | 238  | 0.66 |
| PRKCE   | 3.76E+02 | 0.41 | 11 | 13 | 6.80  | 1 | 0.33 | 66.83 | 3.02 | 53.93  | 700  | 0.31 |
| PLA2G1B | 3.67E+06 | 0.74 | 13 | 13 | 8.64  | 1 | 0.33 | 66.83 | 3.02 | 10.69  | 184  | 0.74 |
| SIRT2   | 1.14E+04 | 0.65 | 13 | 13 | 9.19  | 1 | 0.33 | 66.67 | 3.01 | 9.02   | 130  | 0.65 |
| LRRK2   | 2.07E+03 | 0.56 | 12 | 12 | 7.51  | 1 | 0.33 | 66.00 | 2.99 | 42.95  | 522  | 0.58 |
| MIF     | 4.45E+05 | 0.82 | 12 | 12 | 9.16  | 1 | 0.25 | 65.75 | 2.98 | 2.50   | 44   | 0.85 |
| G6PD    | 1.92E+03 | 0.58 | 11 | 11 | 6.46  | 1 | 0.25 | 64.75 | 2.94 | 74.18  | 800  | 0.62 |
| TRPA1   | 5.08E+02 | 0.46 | 11 | 11 | 5.55  | 1 | 0.25 | 59.75 | 2.70 | 18.19  | 138  | 0.49 |
| PLA2G4A | 6.02E+03 | 0.63 | 11 | 11 | 7.95  | 1 | 0.25 | 65.42 | 2.98 | 6.23   | 74   | 0.67 |
| BCL2A1  | 2.09E+04 | 0.71 | 11 | 11 | 8.03  | 1 | 0.25 | 64.75 | 2.94 | 5.39   | 56   | 0.76 |
| SCN10A  | 2.58E+02 | 0.40 | 10 | 10 | 5.32  | 2 | 0.33 | 63.17 | 2.89 | 202.74 | 2068 | 0.44 |
| MAOB    | 5.90E+01 | 0.33 | 9  | 10 | 5.34  | 1 | 0.33 | 63.17 | 2.89 | 82.82  | 750  | 0.31 |
| PTGIR   | 5.20E+01 | 0.38 | 10 | 10 | 5.50  | 1 | 0.33 | 62.17 | 2.84 | 15.53  | 110  | 0.42 |
| HSF1    | 1.68E+03 | 0.62 | 9  | 10 | 6.67  | 1 | 0.25 | 63.58 | 2.90 | 11.30  | 70   | 0.58 |
| EGLN1   | 2.40E+03 | 0.66 | 10 | 10 | 7.64  | 1 | 0.25 | 64.25 | 2.94 | 3.46   | 52   | 0.73 |
| ITGAV   | 1.81E+03 | 0.62 | 10 | 10 | 7.30  | 1 | 0.25 | 62.75 | 2.87 | 2.90   | 32   | 0.69 |
| IGFBP5  | 4.06E+04 | 0.72 | 10 | 10 | 7.74  | 1 | 0.33 | 65.17 | 2.98 | 1.69   | 26   | 0.80 |
| AXL     | 3.63E+05 | 0.78 | 10 | 10 | 8.62  | 1 | 0.25 | 64.92 | 2.97 | 1.40   | 18   | 0.87 |
| GRIK2   | 1.32E+02 | 0.48 | 9  | 9  | 3.87  | 1 | 0.25 | 60.75 | 2.79 | 46.77  | 412  | 0.56 |
| PDE5A   | 1.45E+03 | 0.57 | 9  | 9  | 6.89  | 1 | 0.25 | 63.92 | 2.94 | 7.48   | 148  | 0.67 |
| PPIA    | 2.28E+03 | 0.69 | 9  | 9  | 6.86  | 1 | 0.25 | 62.92 | 2.89 | 1.25   | 22   | 0.81 |
| SLC1A3  | 5.40E+01 | 0.35 | 8  | 8  | 4.32  | 2 | 0.25 | 60.75 | 2.80 | 33.15  | 262  | 0.43 |

|          |          |      |   |   |      |   |      |       |      |       |     |      |
|----------|----------|------|---|---|------|---|------|-------|------|-------|-----|------|
| ECE1     | 5.60E+01 | 0.52 | 6 | 8 | 5.48 | 1 | 0.33 | 63.50 | 2.94 | 9.47  | 124 | 0.39 |
| F7       | 5.06E+03 | 0.70 | 8 | 8 | 5.63 | 1 | 0.25 | 61.58 | 2.84 | 5.09  | 92  | 0.86 |
| SCN2A    | 2.80E+01 | 0.57 | 4 | 7 | 3.23 | 2 | 0.25 | 57.25 | 2.64 | 79.17 | 764 | 0.38 |
| CAMK4    | 1.90E+01 | 0.38 | 6 | 7 | 4.13 | 1 | 0.33 | 60.83 | 2.83 | 10.68 | 116 | 0.38 |
| GLRA1    | 9.60E+01 | 0.55 | 7 | 7 | 3.23 | 1 | 0.25 | 54.25 | 2.50 | 9.91  | 130 | 0.71 |
| TRPM8    | 3.60E+02 | 0.66 | 7 | 7 | 4.07 | 1 | 0.25 | 56.33 | 2.60 | 1.48  | 16  | 0.86 |
| F13A1    | 1.44E+03 | 0.73 | 7 | 7 | 6.57 | 1 | 0.33 | 62.17 | 2.89 | 0.10  | 2   | 0.95 |
| GLP1R    | 3.00E+01 | 0.48 | 6 | 6 | 5.37 | 1 | 0.25 | 61.92 | 2.89 | 3.53  | 78  | 0.67 |
| MAPKAPK2 | 3.20E+01 | 0.43 | 6 | 6 | 5.43 | 1 | 0.33 | 61.67 | 2.88 | 2.55  | 30  | 0.60 |
| CASP2    | 7.20E+01 | 0.57 | 6 | 6 | 5.30 | 1 | 0.25 | 60.75 | 2.83 | 0.90  | 6   | 0.80 |
| GC       | 2.50E+01 | 0.57 | 4 | 5 | 3.89 | 1 | 0.25 | 54.67 | 2.56 | 9.07  | 64  | 0.60 |
| IL6ST    | 2.50E+01 | 0.57 | 4 | 5 | 4.20 | 1 | 0.25 | 59.08 | 2.76 | 1.10  | 12  | 0.60 |
| GRIK1    | 4.80E+01 | 0.58 | 5 | 5 | 2.30 | 1 | 0.25 | 49.92 | 2.31 | 0.48  | 4   | 0.90 |
| SLC18A2  | 4.00E+00 | 0.31 | 2 | 4 | 2.78 | 1 | 0.25 | 53.42 | 2.52 | 3.87  | 38  | 0.17 |
| PTPRS    | 8.00E+00 | 0.38 | 4 | 4 | 3.64 | 1 | 0.25 | 57.75 | 2.72 | 0.74  | 10  | 0.67 |
| AKR1A1   | 3.00E+00 | 0.31 | 2 | 3 | 1.87 | 1 | 0.25 | 47.42 | 2.21 | 3.35  | 10  | 0.33 |
| CYP27B1  | 2.00E+00 | 0.00 | 1 | 2 | 2.35 | 1 | 0.25 | 55.50 | 2.63 | 2.84  | 64  | 0.00 |
| CACNA2D1 | 2.00E+00 | 0.31 | 2 | 2 | 1.22 | 1 | 0.25 | 43.17 | 1.96 | 0.00  | 0   | 1.00 |
| PEPD     | 2.00E+00 | 0.31 | 2 | 2 | 2.07 | 1 | 0.25 | 48.92 | 2.30 | 0.00  | 0   | 1.00 |
| MERTK    | 2.00E+00 | 0.31 | 2 | 2 | 2.08 | 1 | 0.25 | 51.42 | 2.44 | 0.00  | 0   | 1.00 |
| PDE1A    | 1.00E+00 | 0.00 | 1 | 1 | 1.43 | 1 | 0.25 | 45.42 | 2.13 | 0.00  | 0   | 0.00 |
| CHRNA    | 1.00E+00 | 0.00 | 1 | 1 | 1.74 | 1 | 0.25 | 52.83 | 2.53 | 0.00  | 0   | 0.00 |
| EPHX1    | 1.00E+00 | 0.00 | 1 | 1 | 1.63 | 1 | 0.25 | 46.42 | 2.20 | 0.00  | 0   | 0.00 |
| MAP3K12  | 1.00E+00 | 0.00 | 1 | 1 | 1.52 | 1 | 0.25 | 46.50 | 2.21 | 0.00  | 0   | 0.00 |

Footnotes: MCC:Maximal Clique Centrality; MNC:Maximum Neighborhood Component; EPC: Edge Percolated Component; DMNC: Density of Maximum Neighborhood Component.

**Table S5.** Molecular docking details of EGFR to the putative ligands.

| <b>Mol ID</b> | <b>Molecule Name</b>                        | <b>PubChem_ID</b> | <b>Docking Score</b> |
|---------------|---------------------------------------------|-------------------|----------------------|
| MOL005314     | Celabenzine                                 | 442847            | -8.7                 |
| MOL000006     | luteolin                                    | 5280445           | -8.4                 |
| MOL002776     | Baicalin                                    | 64982             | -8.4                 |
| MOL005344     | ginsenoside rh2                             | 119307            | -8.3                 |
| MOL002293     | Sennoside D qt                              | 135397905         | -8.3                 |
| MOL002925     | 5,7,2',6'-Tetrahydroxyflavone               | 5321865           | -8.2                 |
| MOL002933     | 5,7,4'-Trihydroxy-8-methoxyflavone          | 5322078           | -8.2                 |
| MOL005376     | Panaxadiol                                  | 73498             | -8.1                 |
| MOL007401     | Cirsiliol                                   | 160237            | -8.1                 |
| MOL001689     | acacetin                                    | 5280442           | -8.1                 |
| MOL002881     | Diosmetin                                   | 5281612           | -8.1                 |
| MOL000525     | Norwogonin                                  | 5281674           | -8.1                 |
| MOL002280     | Torachryson-8-O-beta-D-(6'-oxayl)-glucoside | 78385603          | -8.1                 |
| MOL000791     | bicuculline                                 | 10237             | -8                   |
| MOL002908     | 5,8,2'-Trihydroxy-7-methoxyflavone          | 156992            | -8                   |
| MOL000173     | wogonin                                     | 5281703           | -8                   |
| MOL009091     | xanthogalenol                               | 14309735          | -8                   |
| MOL005356     | Girinimbin                                  | 96943             | -7.9                 |
| MOL002259     | Physciondiglucoside                         | 442762            | -7.9                 |
| MOL001978     | Aureusidin                                  | 5281220           | -7.9                 |
| MOL007105     | epidanshenspiroketalactone                  | 102004791         | -7.9                 |
| MOL000940     | bisdemethoxycurcumin                        | 5315472           | -7.8                 |
| MOL007274     | Skrofulein                                  | 188323            | -7.7                 |
| MOL002714     | baicalein                                   | 5281605           | -7.7                 |
| MOL007093     | dan-shexinkum d                             | 124307626         | -7.7                 |
| MOL001601     | 1,2,5,6-tetrahydrotanshinone                | 124416            | -7.6                 |
| MOL004609     | Areapillin                                  | 158311            | -7.6                 |
| MOL000354     | isorhamnetin                                | 5281654           | -7.6                 |
| MOL007120     | miltionone II                               | 5319836           | -7.6                 |
| MOL002928     | oroxylin a                                  | 5320315           | -7.6                 |
| MOL000392     | formononetin                                | 5280378           | -7.5                 |
| MOL007101     | dihydrotanshinoneI                          | 40785034          | -7.5                 |
| MOL000522     | arctiin                                     | 100528            | -7.4                 |
| MOL007061     | Methylenetanshinquinone                     | 105118            | -7.4                 |
| MOL002651     | Dehydrotanshinone II A                      | 128994            | -7.4                 |
| MOL000098     | quercetin                                   | 5280343           | -7.4                 |

|           |                                                                                                                  |           |      |
|-----------|------------------------------------------------------------------------------------------------------------------|-----------|------|
| MOL002721 | quercetagetin                                                                                                    | 5281680   | -7.4 |
| MOL004083 | Tamarixetin                                                                                                      | 5281699   | -7.4 |
| MOL003305 | PHILLYRIN                                                                                                        | 101712    | -7.3 |
| MOL007041 | 2-isopropyl-8-methylphenanthrene-3,4-dione                                                                       | 135872    | -7.3 |
| MOL005317 | Deoxyharringtonine                                                                                               | 285342    | -7.3 |
| MOL000422 | kaempferol                                                                                                       | 5280863   | -7.3 |
| MOL002712 | 6-Hydroxykaempferol                                                                                              | 5281638   | -7.3 |
| MOL004112 | Patuletin                                                                                                        | 5281678   | -7.3 |
| MOL007050 | 2-(4-hydroxy-3-methoxyphenyl)-5-(3-hydroxypropyl)-7-methoxy-3-benzofurancarboxaldehyde                           | 6709746   | -7.3 |
| MOL007132 | (2R)-3-(3,4-dihydroxyphenyl)-2-[(Z)-3-(3,4-dihydroxyphenyl)acryloyl]oxy-propionic acid                           | 9841799   | -7.3 |
| MOL002694 | 4-[(E)-4-(3,5-dimethoxy-4-oxo-1-cyclohexa-2,5-dienylidene)but-2-enylidene]-2,6-dimethoxycyclohexa-2,5-dien-1-one | 10237057  | -7.3 |
| MOL002915 | Salvigenin                                                                                                       | 161271    | -7.2 |
| MOL002932 | Panicolin                                                                                                        | 5320399   | -7.2 |
| MOL007141 | salvianolic acid g                                                                                               | 11530200  | -7.2 |
| MOL007058 | formyltanshinone                                                                                                 | 14609847  | -7.2 |
| MOL005308 | Aposiopolamine                                                                                                   | 101612220 | -7.2 |
| MOL007424 | artemisinin                                                                                                      | 68827     | -7.1 |
| MOL000552 | 5,2'-Dihydroxy-6,7,8-trimethoxyflavone                                                                           | 159029    | -7.1 |
| MOL007082 | Danshenol A                                                                                                      | 3083514   | -7.1 |
| MOL002235 | EUPATIN                                                                                                          | 5317287   | -7.1 |
| MOL007069 | przewaquinone c                                                                                                  | 126071    | -6.9 |
| MOL007155 | (6S)-6-(hydroxymethyl)-1,6-dimethyl-8,9-dihydro-7H-naphtho[8,7-g]benzofuran-10,11-dione                          | 9926694   | -6.9 |
| MOL002268 | rhein                                                                                                            | 10168     | -6.8 |
| MOL007156 | tanshinone VI                                                                                                    | 149138    | -6.8 |
| MOL007412 | DMQT                                                                                                             | 5281603   | -6.8 |
| MOL003605 | (E)-2,3-bis(2-keto-7-methoxy-chromen-8-yl)acrolein                                                               | 10597338  | -6.8 |
| MOL003607 | cniforin B                                                                                                       | 58488745  | -6.8 |
| MOL003584 | Xanthoxylin N                                                                                                    | 66548     | -6.7 |

---

|           |                                           |          |      |
|-----------|-------------------------------------------|----------|------|
| MOL007425 | dihydroartemisinin                        | 3000518  | -6.7 |
| MOL002917 | 5,2',6'-Trihydroxy-7,8-dimethoxyflavone   | 5322059  | -6.7 |
| MOL007077 | scclareol                                 | 7060889  | -6.7 |
| MOL003370 | Onjixanthone I                            | 5320290  | -6.5 |
| MOL005357 | Gomisin B                                 | 6438572  | -6.5 |
| MOL003606 | cniforin A                                | 15553295 | -6.5 |
| MOL002927 | Skullcapflavone II                        | 124211   | -6.4 |
| MOL002909 | 5,7,2,5-tetrahydroxy-8,6-dimethoxyflavone | 44258628 | -6.4 |
| MOL005229 | Artemetin                                 | 5320351  | -6.2 |
| MOL013287 | Physovenine                               | 442113   | -6.1 |
| MOL001389 | n-heptanal                                | 8130     | -4.3 |

---
